# Supplementary material for: Risk Factors and Causes of Mortality Among Anesthesiologists: Evidence from a Libyan multicenter observational case-control study
Source: Research Square preprint supplement (doi:10.21203/rs.3.rs-8372781/v1), 2025-12-30
Supplement: Supplementary file 1 [file 9666239e1e89e86afa3614ba.xlsx]

## Sheet: Sheet1
Demographic											Smoking history			Marital status				Social problems					Clinical history																		List your prescribed drugs and over-the-counter drugs, such as vitamins and inhalers
Date	Place	Code	Age	Age group	Sex	Nationality	Occupation	Rt start date	Weight	Height	History of smoking	For how long	Cigarette per day	Marital status	If married, are you pregnant?	if yes, which week?	Number of children	Economic	Feeling isolated from peers and/or family.	low esteem	Lack of self-time	Family issues	Hypertension	systolic mmhg	diastolic mmhg	How long	Treatment	Diabetes	………..mg/dl	How long2	Treatment3	Cardiac vascular Diseases	If yes cardiac, what is it	Treatment4	Chest pain	Fatigue	shortness of breath	Rheumatic diseases	Treatment5	Another disease	Name the Drug1	Strength1	Frequency Taken1	Name the Drug2	Strength2	Frequency Taken2	Name the Drug3	Strength3	Frequency Taken3
2022-09-14	TMC	TCDC38	39	<40	F	LIBYAN	PHYSICIAN	2013	80	165	No			Single				No	No	No		No	No					No				No			No	No	No	No		NO	PARACETAMOL	1gm	SOS	MEGAFEN		SOS
2022-09-14	TMC	TCDC37	50	40-60	F	LIBYAN	PHYSICIAN	2002	80		No			Single				No	No	No	No	No	No					No				No			No	No	No	No		NO	PARACETAMOL	1gm	SOS	VOLTAREN	100MG	SOS
2022-09-14	TMC	TCDC 36	32	<40	m	LIBYAN	PHYSICIAN	2016			No			Single				No	yes	No	Yes	No	no	140	90			No				No			Yes	No	No	No
2022-09-14	TMC	TCDC 35	32	<40	m	LIBYAN	PHYSICIAN	2018	72	170	No			Single				Yes	No	No	Yes	No	no					no				No			No	No	No	No
2022-09-13	TMC	TCDC 31	35	<40	f	LIBYAN	PHYSICIAN	2012		168	No			married	Yes	11	2 children	No	No	No	Yes	No	No					No				No			No	Yes	No	No		GASTRITIS	omeprazole	40 mg	Daily	Vitamin D			Multivitamin
2022-09-13	TMC	TCDC 32	42	40-60	f	LIBYAN	PHYSICIAN	2009		159	No			married	No		1 child	No	No	No	Yes	Yes	No					No				No			No	Yes	No	No			MULTIVITAMIN			Vitamin D
2022-09-13	TMC	CCDC 10	28	<40	F	LIBYAN	PHYSICIAN		55	168	No			Single				No	No				no					no				No			Yes	Yes	No	No
2022-09-13	TMC	TCDC 34	56	40-60	F	LIBYAN	PHYSICIAN	1991	59		No			married			3 children	No	No	No	No	No	Yes	130	70	6	atacand 8 mg / concor 5mg	No				No			Yes	Yes	Yes	No		HISTORY OF BREAST CANCER
2022-09-13	TMC	ZCDC 01	37	<40	M	LIBYAN			105	180	No			married			3 children	No	No	No	yes	Yes	no					no				no			no	no	no	no
2022-09-13	TMC	TCDC 33	46	40-60	f	LIBYAN	TECHNICIAN	1997	50	165	No			Single							Yes	Yes	No					No				No			Yes	no	Yes	No
2022-09-12	TMC	TCDC 28	53	40-60	f	LIBYAN	PHYSICIAN	1998	97	164	No			married	No		2 children	No	No	No	No	No	Yes				concor 2.5 mg/ micardis 40 mg	no				No			No	No	No	No		HYPOTHYROIDISM	CONCOR	2.5 mg	once daily	MICARDIS	40 mg	once daily	Thyroxine	100 mg	once daily
2022-09-12	KH	HCDC 19	33	<40	M		PHYSICIAN				No			married			No children	No	No	No	yes	No	no	140	90			no				No			No	yes	no	No		no
2022-09-12	KH	HCDC 18	56	40-60	M		TECHNICIAN	1988	94	183	No			married			No children	No	No	No	No	No	Yes	140	82			No				No			Yes	no	No	No		no	AMLODIPINE	10 mg		candesartan	16 mg
2022-09-12	GH	GCDC 02	33	<40	M	LIBYAN	PHYSICIAN		93	185	No			married			2 children	Yes	Yes		Yes		no					no				no			Yes	Yes	No	No		ASTHMA & MIGRAINE	PARACETAMOL	1 mg	3 - 4 times / week
2022-09-14	CH	CCDC11	43	40-60	M	LIBYAN	PHYSICIAN	2007	94	173	Yes	10		married			No children	No	No	No	No	No	no					Yes	160	10	janumet 50/1000 mg	No			No	No	No	No		no
2022-09-12	TMC	TCDC 29	31	<40	M	LIBYAN	TECHNICIAN	2015	65	157	No			married			No children	Yes	No	No	yes	No	no					no				No			No	Yes	No	No		no
2022-09-12	TMC	TCDC 30	38	<40	F	LIBYAN	PHYSICIAN	2009	72	170	No			married	No		3 children	No	No	No	No	No	no					no				no			Yes	Yes	Yes	no		MIGRAINE
2022-07-09	CH	CCDC05	38	<40	F	LIBYAN	PHYSICIAN	2011			No			Single				No	No	No	No	No	no					no				No			No	No	No	No		no
2022-09-15	CH	CCDC18	30	<40	F	LIBYAN	PHYSICIAN	2019	45	158	Yes			Single				No	No	No	no	No	no					no				no			no	no	no	no		no
2022-09-15	TMC	TCDC40	43	40-60	F	LIBYAN	PHYSICIAN		88		No			married	No		No children	No	No		Yes	No	No					No				no			Yes	Yes	Yes	No		HYPOTHYROIDISM/fibromyalgia/asthmatic/MTHFR gene mutation/Antithrombin III dificency/oesophegeal reflux	THYROXINE	50MG	Daily	MULTIVITAMIN
2022-09-15	CH	CCDC15	46	40-60	F	LIBYAN	PHYSICIAN	2002	72	172	No			married	No		4 or more children	Yes				Yes	no					no				no			Yes	Yes	no	no		LEFT BREAST CANCER	Arimidix	1mg	Daily
2022-09-15	CH	CCDC17	46	40-60	f	LIBYAN	consultant	2002	95	165	No			Single				Yes	No	No	No	No	no					no				no			no	Yes	no	no		no	Vit B complex		not frequent
2022-09-15	CH	CCDC16	53	40-60	f	LIBYAN	PHYSICIAN	1995	88.6	168	No			married	No		4 or more children				Yes		Yes					no				no			no	Yes	no	no		HYPOTHYROIDISM	THYROXINE	100Mg	Daily
2022-09-16	CH	CCDC14	31	<40	M	LIBYAN	PHYSICIAN	2021	67	176	No			Single				No	Yes	No	No	Yes	no					no				no			no	no	no	no		no	panadol
2022-09-15	TMC	TCDC39	40	40-60	M	LIBYAN	TECHNICIAN	2012	85	150	Yes	16	6	married			2 children	No	No	No	Yes	No	Yes	140	100	4	ATACAND 16mg	no				No			Yes	Yes	Yes	No		no
2022-09-16	CH	CCDC13	31	<40	M	LIBYAN	PHYSICIAN	2019	89	170	No			Single				Yes	Yes	No	No	No	no					no				no			no	no	no	no		no
2022-09-15	CH	CCDC12	30	<40	M	LIBYAN	PHYSICIAN	2021	80	175	No			Single				Yes	Yes	No	No	No	no					no				No			No	No	No	No		no
2022-05-09	TMC	TCDC 09	38	<40	F	LIBYAN	PHYSICIAN	2011	65		No			married	No		3 children	No	Yes	No	Yes	No	No					No				No			No	Yes	no	no		no
2022-09-11	TMC	TCDC21	32	<40	M	LIBYAN	TECHNICIAN	2022	70	172	No			Single				No	No	No	No	No	no					no				No			No	No	No	No		no	Panadol
2022-05-09	KH	HCDC 06	37	<40	M	LIBYAN	SPECIALIST				Yes	15	20	married			No children	No	yes	No	No	No	No					No				No			No	Yes	Yes	No		NO	omeprazole	40 mg
2022-09-11	TMC	TCDC23	36	<40	F	LIBYAN	TECHNICIAN	2010	75	159	No			married	No		1 child	Yes	No	No	yes	No	Yes			3	AMLOR	No				No			Yes	Yes	Yes	No		no	multivitamin
2022-05-09	TMC	TCDC 10	31	<40	f	LIBYAN	PHYSICIAN		57		No			married	Yes	6	No children	Yes	Yes	No	Yes	Yes	No					No				No			No	Yes	No	No		no
2022-05-09	KH	HCDC 03	30	<40	f	LIBYAN			68		No			married	No		1 child	No	No	No	Yes	No	no					no				No			No	No	No	No		no	pregnacare plus omega 3		Daily
2022-05-09	tripoli	TCDC 08	45	40-60	f	LIBYAN	SPECIALIST	2021	75	165	No			Single			No children	No	No	No	No		no	111	60			No				No			No	No	No	No		no
2022-09-11	TMC	TCDC22	45	40-60	F	LIBYAN	SPECIALIST		68	164	No			Single				Yes	Yes	No	Yes		no					no				No			Yes	Yes	No	No		NO	Aspirin	75 mg	twice weekly	Magnesium	200 mg	once daily	multivitamin
2022-05-09	BH	ACDC 01	41	40-60	m	JORDAN	PHYSICIAN		106	171	Yes	15	2022-05-10	married			3 children	No	No	yes	yes	No	Yes	140	95	10	concor 5 mg/ ramipril 2.5 mg	Yes	130	8	metformin	No			no	yes	No	No		high uric acid
2022-09-11	CH	CCDC09	32	<40	M	LIBYAN	PHYSICIAN	2019	81	184	No			Single				No	No	No	Yes	No	no					no				No			No	Yes	No	No		no	pantoprazole	40 mg		Vit. D			panadol	1000mg	sos
2022-09-11	TMC	TCDC24	29	<40	F	LIBYAN	TECHNICIAN	2019	125	171	No			Single				No	Yes	Yes	Yes	No	no					no				No			No	No	No	No		no	PARACETAMOL			VOLTAREN			Vitamin C/ Vit D
2022-09-11	TMC	TCDC25	50	40-60	M	LIBYAN	consultant		80	186	No			married			4 or more children	No	No	No	No	No	No					No				no			Yes	Yes	Yes	No		SYMPTOMATIC VENTRICULAR ECTOPY
2022-09-11	TMC	TCDC26	34	<40	M	LIBYAN	TECHNICIAN	2014	83	172	Yes			married			3 children						no					no				No			No	No	No	No		no
2022-09-11	GH	GCDC01	32	<40	M		PHYSICIAN				Yes		19	Single				Yes	Yes		Yes		no					no				No			No	Yes	No	No		no
2022-09-11	TMC	TCDC27	32	<40	F	LIBYAN	PHYSICIAN	2019	57	159	No			Single				No	No	No	No	No	No					No				No			No	No	No	No		allergic rhinitis/ conjunctivitis	OMEGA3			PARACETANEL	500MG	SOS
2022-08-09	TMC	TCDC19	38	<40	F	LIBYAN	PHYSICIAN	2010	58	160	No			Single				Yes	Yes	No	Yes	No	No	110	80			No				No			Yes	Yes	No	No		BENIGN VENTRICULAR ECTOPY	Omeprazole	40 mg	daily	Antihistamine		SOS	PANADOL/ voltaren		SOS
2022-09-08	TMC	TCDC20	29	<40	F	LIBYAN	TECHNICIAN		54		No			Single				Yes	No	No	No	No	no					no				No			No	No	No	No		no	MULTIVITAMIN			Vitamin D			OMEGA3
2022-08-09	CH	CCDC07	37	<40	M	LIBYAN		2015	85	175	No			married			3 children	No	No	No	Yes	No	Yes	140	90	3	MICARDIS	No				No			No	No	No	No		no	Micardis	80 mg	once daily
2022-08-09	KH	HCDC16	47	40-60	M	LIBYAN	CONSULTANT	2001	65	167	No			married			4 or more children	No	No	No	No	No	No					No				No			No	No	No	No		ARRYTHMIA not on regular treatment
2022-08-09	KH	HCDC17	36	<40	M	LIBYAN	PHYSICIAN	2014	83	165	Yes	3	vape	married			4 or more children	No	No	No	Yes	No	no					no				No			Yes	No	Yes	No		no
2022-05-09	KH	HCDC 04	55	40-60	f	LIBYAN	CONSULTANT	1995	68		No			Single				No	No	No	No	No	Yes			4	losartan 100 mg	Yes		8	metformin	No			No	No	No	No		no	losartan	100 mg	Daily	metformin		Daily	Muscle relaxant		Occasionally
2022-05-09	MH	MCDC 01	50	40-60	m	LIBYAN	TECHNICIAN	2000	74	173	Yes	10	4	married			3 children	No	No	No	Yes	No	Yes	110	70	14	lisinopril 10mg	no				no			no	NO	no	no		No
2022-08-09	MH	ACDC04	41	40-60	M	LIBYAN	Anesthesiologist	2021	85	163	No			married			2 children	Yes	No	No	No	No	Yes	130	90	2	ATACAND	no				No			No	No	No	No		NO
2022-05-09	THC	CCDC02	29	<40	F	LIBYAN	PHYSICIAN				No			Single				yes		No	No	yes	No					No				No			No	Yes	Yes	No		NO	vitamin c	1000 mg	Daily	MULTIVITAMIN		Daily
2022-07-09	TMC	TCDC18	31	<40	M	LIBYAN	PHYSICIAN		78	175	No			Single				No	No	No	No	No	no					no				No			No	No	No	No		NO
2022-05-09		CCDC 01	31	<40	M	LIBYAN	PHYSICIAN		104	177	Yes	3	VAPE	Single				Yes	No	No	YES	No	No					No				No			No	Yes	No	No		no
2022-04-09		HCDC 05	55	40-60	F	LIBYAN	anaesthetist		80		No			married	NO		4 or more children	No	No	No	YES	yes	No					No				No			No	Yes	No	No		no
2022-04-09		tcdc 03	57	40-60	m	LIBYAN	TECHNICIAN		80		No			married			4 or more children	No	No	No	yes	No	No					No				No			No	No	No	No		NO
2022-04-09	TMC	tcdc 05	55	40-60	f	LIBYAN	CONSULTANT		81	158	No			married	NO		4 or more children	No	No	No	No	No	no					no				no			no	yes	no	no		HYPOTHYROIDISM	LEVOTHYROXINE	100mg	Daily	MULTIVITAMIN
2022-07-09	MH	MCDC04	39	<40	f	LIBYAN	PHYSICIAN	2010	125	165	No			married	No		1 child	Yes	Yes	No	Yes	No	no					no				No			Yes	Yes	Yes	No		no	OMeprazole	40MG	Daily
2022-07-09		ACDC02	44	40-60	M	LIBYAN	PHYSICIAN		96	187	No			married			3 children	No	No	No	No	No	no					no				No			No	No	No	No		CHRONIC SINUSITIS	panadol sinus		2 / MONTH	OTRIVIN DROPS		2 TIMES EACH 3 MONTHS
2022-07-09	TMC	TCDC17	34	<40	F	LIBYAN	PHYSICIAN		78	170	No			Single				No	No	No	Yes	No	no					no				No			No	No	No	No		no
2022-04-09	TMC	TCDC 04	35	<40	M	LIBYAN	PHYSICIAN	2017	94		Yes	5	10	married			2 children	No	No	No	yes	No	no	130	80			no				No			No	No	No	No		crohn's disease
2022-08-21	BH	ACDC03	37	<40	M	LIBYAN	PHYSICIAN		116	181	No			married			1 child	No	No	No	No	No	no	130	80		No	no				No			Yes	No	No	No		RENAL STONE	PARACETAMOL	1G	1EVRY 3DAYS
2022-04-09		TCDC 02	37	<40	M	LIBYAN	PHYSICIAN	2010	77	163	No			married			2 children	No	No	No	Yes	No	no					no				no			no	yes	no	no		RENAL STONE
2022-07-09	TMC	TCDC16	31	<40	F	LIBYAN	PHYSICIAN		67	160	No			Single				No	No	Yes	Yes	No	no					no				No			No	No	No	No		GASTRITIS	PROPOLIS		2/DAY	probiotic		once Daily
2022-04-09	TMC	TCDC 01	65	>60	M	LIBYAN	CONSULTANT	1983	66	164	No			married			3 children	No	No	No	No	No	no					no				no			no	Yes	no	no		HYPOTHYROIDISM	THYROXINE	125mg	once Daily	Vitamin D	500000 mg	1 /week /month	Rusovastatin	10mg	Daily
2022-07-09		CCDC04	38	<40	M	LIBYAN			105	182	No			married			2 children	Yes	No	No	Yes	Yes	Yes	160	100	2	ENALAPRIL 10 mg	no				No			No	No	No	No		no	MULTIVITAMIN
2022-04-09	KH	HCDC 01	41	40-60	M	LIBYAN	PHYSICIAN	2012	100	180	Yes	14	20	married			No children	Yes	No	No	Yes	No	no					no				no			no	yes	no	no		no	atrovastatin	20 MG	Daily
2022-04-09		HCDC 02	38	<40	f	LIBYAN	PHYSICIAN		75		No			married			3 children	Yes	Yes		Yes		yes	130	90	7		no				yes			no	yes	yes	no		no
2022-04-09	TMC	TCDC 07	34	<40	M	LIBYAN	PHYSICIAN	2017	112		No			married			1 child	Yes	No	No	No	Yes	no					no				no			Yes	no	Yes	no		no	fluoxetine	20 mg	ONCE Daily
2022-07-09	TCH	CCDC06	33	<40	M	LIBYAN	PHYSICIAN		65.1	173	Yes	14	40	Single				No	No	No	Yes	No	no					no				No			No	No	No	No		NO	VIT D ing		every 3 monthes	MULTIVITAMIN
2022-04-09		TCDC 06	50	40-60	M	LIBYAN			110	175	Yes			married			4 or more children						no	140	90			no				Yes			Yes	Yes	Yes	No		no
2022-06-09	MH	MCDC 03	37	<40	M	LIBYAN	PHYSICIAN	2011	130	179	Yes	12	20	married			2 children	Yes	No	no	yes	no	no					no				No			Yes	No	Yes	No		no
2022-06-09	CH	CCDC 03	45	40-60	F	LIBYAN	specialist	2005	68	165	No			married	No		2 children	Yes	No	No	Yes	No	no					no				no			no	no	no	no		no	VIT D	20.000 IU	IRREGULAR	MULTIVITAMIN		IRREGULAR
2022-07-09	KH	HCDC12	51	40-60	M	LIBYAN	PHYSICIAN		69		No			married			4 or more children	No	No	No	Yes		no					no				no			no	no	no	no		Depression	SERTRALINE	50MG	once daily
2022-06-09		HCDC 10	40	40-60	M	LIBYAN	PHYSICIAN	2012	93	184	Yes	7		married			2 children	No	No	No	No	No	no					no				No			No	No	No	No		no
2022-07-09	KH	HCDC15	34	<40	F	LIBYAN	PHYSICIAN	2014	69	167	No			Single				No	No	No	Yes	No	no					no				No			No	Yes	No	No		no	OMEGA3			MULTIVITAMIN
2022-06-09		HCDC 11	28	<40	F	LIBYAN	PHYSICIAN		105		No			married	No						Yes		no					no				no			yes	yes	yes	no		no	PARACETAMOL	500	3 times / week	Muscle relaxant			Voltaren	100
2022-06-09	tripoli	HCDC 07	44	40-60	M	LIBYAN	SPECIALIST	2007	65	165	No			married			3 children	No	No	No	No	No	no					no				no			no	no	no	no		no
2022-06-09	KH	HCDC 08	43	40-60	F	LIBYAN	PHYSICIAN		78	176	No			married	No		3 children	Yes					no					no				no			no	no	no	no		meniscus tear bilateral	vit d	50.000 iu	pe weak for life
2022-06-09	KH	HCDC 09	39	<40	m	LIBYAN	PHYSICIAN	2012	96	179	No			married			1 child	No	No	No	No	No	Yes			1 year	off of treatment	no				No			No	No	No	No		no
2022-06-09		TCDC 11	25	<40	f	LIBYAN	TECHNICIAN	2019	68	159	No			married	No		1 child		No	Yes	Yes		no					no				No			No	No	No	No		no
2022-06-09		TCDC 12	44	40-60	m	LIBYAN	TECHNICIAN	2000	80	160	No			married			3 children	No	No	No	No	No	no					Yes		9		Yes			Yes	No	No	No		no
2022-07-09	KH	HCDC14	42	40-60	M	palestinian	PHYSICIAN	2007	93	182	No			married			4 or more children	Yes	No	No		No	no					no				No			No	No	No	No		NO
2022-07-09		HCDC13	42	40-60	M	LIBYAN	CONSULTANT	2007	83		Yes	20	10	married			2 children	No	No	No	Yes	No	No	110	70			no				No			No	No	No	No		no
2022-06-09	TMC	TCDC13	39	<40	F		TECHNICIAN	2006	80	165	No			married	No		4 or more children	Yes	No	Yes	Yes		no					no				No			Yes	Yes	Yes	No		no
2022-06-09		MCDC02	33	<40	M	LIBYAN	PHYSICIAN	2017	88	169	Yes	16	20	married			3 children	Yes	No	Yes	Yes	Yes	no					no				no			Yes	Yes	Yes	No		no
2022-06-09		TCDC15	47	40-60	F	LIBYAN		1997	61		No			married	NO		4 or more children	No	No	No	Yes	No	no					no				No			No	No	No	No		Hypothyroidism	thyroxine	100 mg	once daily
2022-06-09		TCDC14	35	<40	F		TECHNICIAN	2011	75	162	No			married	No		3 children	Yes	No	Yes	Yes	No	no					no				No			Yes	Yes	Yes	No		CHRONIC SINUSITIS
2022-09-20	TMC	TCDC41	34	<40	F	LIBYAN	PHYSICIAN	2016	80		No			married	Yes	24	1 child	No	No	No	No	No	yes	140	90		methyldopa	No				Yes	MILD/MODERAT MR		no	Yes	No	no		no
		39.375
[truncated: 58 more columns]

## Sheet: Sheet2
Code	ECG 1	ECG2	ECG3	ECHO 1	ECHO2	ECHO 3
TCDC38	1	8		1	63	7
TCDC37	1	8		1	7
TCDC 36	1	8		1	7
TCDC 35	1	8		1	7
TCDC 31	1	8		1	7
TCDC 32	1	8		1	7
CCDC 10	1	8		1	63	7
TCDC 34	1	8		1	7
ZCDC 01	1	8		1	7
TCDC 33	1	4		1	7
CCDC 28	1	8		1	7
HCDC 19	1	7		1	7
HCDC 18	1	8		1	7
GCDC 02	1	8		2	31
CCDC11	1	7		1	7
TCDC 29	1	8		1	61	7
TCDC 30	1	8		1	7
CCDC05	1	8		1	7
CCDC18	1	62		1	7
TCDC40	1	8		1	7
CCDC15	1	8		1	7
CCDC17	1	7		1	7
CCDC16	1	8		1	7
CCDC14	1	8		1	7
TCDC39	1	8		1	61	7
CCDC13	1	8		1	7
CCDC12	1	8		1	7
TCDC 09	1	8		1	61	7
TCDC21	1	6	7	1	7
HCDC 06	1	8		1	61
TCDC23	1	8		1	7
TCDC 10	1	7		1	63	7
HCDC 03	1	8		1	7
TCDC 08	1	8		1	7
TCDC22	1	8		1	7
ACDC 01	1	8		1	61	7
CCDC09	1	5	7	1	7
TCDC24	1	8		1	7
TCDC25	1	7		1	7
TCDC26	1	61	7	1	7
GCDC01	1	7		1	7
TCDC27	1	8		1	7
TCDC19	1	8		1	7
TCDC20	1	8		1	7
CCDC07	1	8		1	7
HCDC16	1	8		1	7
HCDC17	1	8		1	7
HCDC 04	1	3		1	7
MCDC 01	1	41		1	7
ACDC04	1	8		1	7
CCDC02	1	8		1	7
TCDC18	1	7		1	7
CCDC 01	1	6		1	7
HCDC 05	1	8		1	7
tcdc 03	1	8		1	7
tcdc 05	1	8		1	7
MCDC04	1	8		1	5
ACDC02	1	8		1	1
TCDC17	1	8		1	7
TCDC 04	1	8		1	7
ACDC03	1	8		1	31	42
TCDC 02	1	8		1	7
TCDC16	1	8		1	7
TCDC 01	1	7		1	7
CCDC04	1	8		1	7
HCDC 01	1	8		1	7
HCDC 02	1	7		1	7
TCDC 07	1	7		1	3
CCDC06	1	8		1	7
TCDC 06	1	4		1	7
MCDC 03	1	8		1	7
CCDC 03	1	8		1	63	61
HCDC12	1	8		1	6	7
HCDC 10	1	4		1	7
HCDC15	1	8		1	7
HCDC 11	1	8		1	7
HCDC 07	1	8		1	7
HCDC 08	1	7		1	7
HCDC 09	1	8		1	7
TCDC 11	1	8		1	7
TCDC 12	1	8		1	7
HCDC14	1	7		1	7
HCDC13	1	8		1	7
TCDC13	1	8		1	7
MCDC02	1	7		1	7
TCDC15	1	8		1	7
TCDC14	1	8		1	7
TCDC40	1	8		1	42	61
